# Supplementary figures and images for: Salvage radiotherapy for relapsed/refractory non‐Hodgkin lymphoma following CD19 chimeric antigen receptor T-cell (CART) therapy
Source: PubMed Central journal article supplement — Clin Transl Radiat Oncol. 2023 Jan 20;39:100587. doi: 10.1016/j.ctro.2023.100587 (PMC9883177; doi:10.1016/j.ctro.2023.100587), 2023-01-20

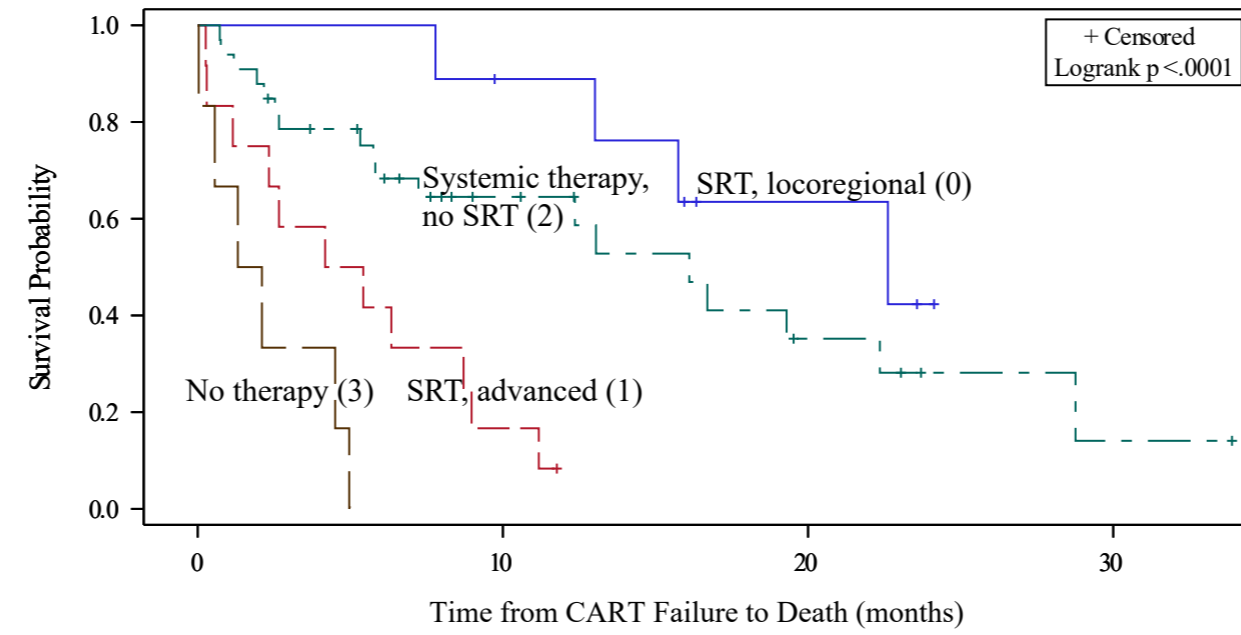

|   |    |    |   |   |
|---|----|----|---|---|
| 0 | 9  | 7  | 3 | 0 |
| 1 | 12 | 2  | 0 |   |
| 2 | 33 | 13 | 5 | 1 |
| 3 | 6  | 0  |   |   |

Supplement: mmc1.pdf [file mmc1.pdf]
